# Supplementary material for: Dilemma of belimumab therapy (dis)continuation during pregnancy: Results of a retrospective study in eudravigilance
Source: PubMed Central journal article supplement — Lupus. 2022 Nov 30;32(2):189–97. doi: 10.1177/09612033221143286 (PMC9939929; doi:10.1177/09612033221143286), 2022-11-30
Supplement: sj-pdf-1-lup-10.1177_09612033221143286.pdf [file sj-pdf-1-lup-10.1177_09612033221143286.pdf]

**Supplementary Table 1: List of co-morbidities included in dataset:**

|                                             |
|---------------------------------------------|
| 1. hypertension                             |
| 2. pre-eclampsia                            |
| 3. nephropathies                            |
| 4. infections                               |
| 5. thyroid disorders (hypo/hyperthyroidism) |
| 6. arthritis                                |
| 7. antiphospholipid-Ab syndrome             |
| 8. SLE flare                                |
| 9. obesity                                  |
| 10. smoking                                 |
| 11. alcohol use                             |
| 12. illicit drug use                        |
| 13. number of previous miscarriages         |
| 14. gestational diabetes                    |
| 15. depression                              |

**Supplementary Table 2: List of co-medications included in dataset:**

|                                  |
|----------------------------------|
| 1. Hydroxychloroquine            |
| 2. Corticosteroids               |
| 3. Azathioprine                  |
| 4. NSAIDs                        |
| 5. MTX                           |
| 6. Mycophenolate mofetil         |
| 7. Acetylsalicylic acid          |
| 8. Anti-coagulants               |
| 9. Anti-hypertensive medications |
| 10. Anti-acids                   |
| 11. Anti-histamines              |
| 12. Levothyroxine                |
| 13. Anti-depressants             |
| 14. Folic acid                   |

**Supplementary Table 3 fetal outcomes per group stratified for exposure to known teratogens**

**I. exposed to known teratogens**

| <b>Outcome</b>       | <b>Stopped (group A); n (%)</b> | <b>Continued (group B); n (%)</b> | <b>total; n (%)</b> |
|----------------------|---------------------------------|-----------------------------------|---------------------|
| <b>Live birth</b>    | <b>5 (35.7)</b>                 | <b>0 (0)</b>                      | <b>5 (33.3)</b>     |
| <b>Fetal death</b>   | <b>9 (64.3)</b>                 | <b>1 (100)</b>                    | <b>10 (66.7)</b>    |
| Spontaneous abortion | 9 (64.3)                        | 1 (100)                           | 10 (66.7)           |
| Still birth          | 0 (0)                           | 0 (0)                             | 0 (0)               |
| <b>Total</b>         | <b>14 (100)</b>                 | <b>1 (100)</b>                    | <b>15 (100)</b>     |

**II. not exposed to known teratogens**

| <b>Outcome</b>       | <b>Stopped (group A); n (%)</b> | <b>Continued (group B); n (%)</b> | <b>total; n (%)</b> |
|----------------------|---------------------------------|-----------------------------------|---------------------|
| <b>Live birth</b>    | <b>32 (58.2)</b>                | <b>10 (50)</b>                    | <b>42 (56)</b>      |
| <b>Fetal death</b>   | <b>23 (41.8)</b>                | <b>10 (50)</b>                    | <b>33 (44)</b>      |
| Spontaneous abortion | 20 (36.3)                       | 10 (50)                           | 30 (40)             |
| Still birth          | 3 (5.5)                         | 0 (0)                             | 3 (4)               |
| <b>Total</b>         | <b>55 (100)</b>                 | <b>20 (100)</b>                   | <b>75 (100)</b>     |

**Supplementary Table 4 fetal outcomes per group stratified for source of report**

**I. reports from the studies**

| <b>Outcome</b>       | <b>Stopped (group A); n (%)</b> | <b>Continued (group B); n (%)</b> | <b>total; n (%)</b> |
|----------------------|---------------------------------|-----------------------------------|---------------------|
| <b>Live birth</b>    | <b>21 (58.3)</b>                | <b>5 (62.5)</b>                   | <b>26 (59.1)</b>    |
| <b>Fetal death</b>   | <b>15 (41.7)</b>                | <b>3 (37.5)</b>                   | <b>18 (40.9)</b>    |
| Spontaneous abortion | 13 (36.1)                       | 3 (37.5)                          | 16 (36.4)           |
| Still birth          | 2 (5.6)                         | 0 (0)                             | 2 (4.6)             |
| <b>Total</b>         | <b>36 (100)</b>                 | <b>8 (100)</b>                    | <b>44 (100)</b>     |

**II. spontaneous reports**

| <b>Outcome</b>       | <b>Stopped (group A); n (%)</b> | <b>Continued (group B); n (%)</b> | <b>total; n (%)</b> |
|----------------------|---------------------------------|-----------------------------------|---------------------|
| <b>Live birth</b>    | <b>16 (48.5)</b>                | <b>5 (38.5)</b>                   | <b>21 (45.6)</b>    |
| <b>Fetal death</b>   | <b>17 (51.5)</b>                | <b>8 (61.5)</b>                   | <b>25 (54.4)</b>    |
| Spontaneous abortion | 16 (48.5)                       | 8 (61.5)                          | 24 (52.2)           |
| Still birth          | 1 (3)                           | 0 (0)                             | 1 (2.2)             |
| <b>Total</b>         | <b>33 (100)</b>                 | <b>13 (100)</b>                   | <b>46 (100)</b>     |

**Supplementary table 5 reported infections in neonates (including twin pregnancies)**

| Outcome                                        | Stopped (group A)                                                                                                                                                                                                                                                                                                                                                                                                                                                                   | Continued (group B)                                                                                                                                                                                                                                                                      |
|------------------------------------------------|-------------------------------------------------------------------------------------------------------------------------------------------------------------------------------------------------------------------------------------------------------------------------------------------------------------------------------------------------------------------------------------------------------------------------------------------------------------------------------------|------------------------------------------------------------------------------------------------------------------------------------------------------------------------------------------------------------------------------------------------------------------------------------------|
| <b>Live births</b>                             | <b>37</b>                                                                                                                                                                                                                                                                                                                                                                                                                                                                           | <b>10</b>                                                                                                                                                                                                                                                                                |
| <b>Reported infections; n (%), description</b> | <p>4 (10.8)</p> <ul style="list-style-type: none"> <li>-upper respiratory infection and enteritis due to rotavirus in a neonate with undescended testicle,</li> <li>-Dandy-Walker syndrome and pneumonia and death at 5 months of age,</li> <li>-viral upper respiratory tract infection at 4 months of age in a neonate with spinal cord anomaly,</li> <li>-respiratory syncytial virus infection in one of the twins with congenital torticollis at 1,5 months of age,</li> </ul> | <p>2 (20)</p> <ul style="list-style-type: none"> <li>-sepsis with antibiotic therapy in one of the premature twins (exposure to belimumab until 3<sup>rd</sup> trimester)</li> <li>-viral meningitis at 1 month of age (exposure to belimumab until 2<sup>nd</sup> trimester)</li> </ul> |
